# Supplementary material for: Vegetation Structure and Tree Species Diversity inside and outside a Newly Established Zalon Taung National Park in Northwest Myanmar
Source: Hindawi journal article supplement (doi:10.1155/2023/8409374), 2023-05-09
Supplement: f1 [file 8409374.f1.docx]

**Appendix**

**IVI % of Tree Species in Zalon Taung National Park (ZNP)**

| **No.** | **Species** | **Family** | **Local Name** | **Relative Frequency** | **Relative Dominance** | **Relative Density** | **IVI** |
| --- | --- | --- | --- | --- | --- | --- | --- |
| 1 | *Dipterocarpus alatus* | Dipterocarpaceae | Kanyin | 5.223881 | 10.07772 | 3.0837 | 18.3853 |
| 2 | *Xerospermum noronhianum* | Sapindaceae | Thit-nyo | 5.373134 | 6.873061 | 3.524229 | 15.77042 |
| 3 | *Protium serratum* | Burseraceae | Thadi | 5.820896 | 4.097131 | 3.524229 | 13.44226 |
| 4 | *Baccaurea sapida* | Euphorbiaceae | Kanaso | 5.373134 | 3.582451 | 2.643172 | 11.59876 |
| 5 | *Dracontomelon dao* | Anacardiaceae | Ngar-bauk | 1.641791 | 6.971972 | 2.643172 | 11.25693 |
| 6 | *Terminalia crenulate* | Combretaceae | Htauk-kyant | 4.029851 | 4.082225 | 3.0837 | 11.19578 |
| 7 | *Dillenia pentagyna* | Dilleniaceae | Zin-byun | 4.776119 | 2.226705 | 3.964758 | 10.96758 |
| 8 | *Premna latifolia* | Verbanaceae | Sate-hnan | 3.134328 | 3.506509 | 2.202643 | 8.843481 |
| 9 | *Cedrela serrata* | Meliaceae | Taung-tama | 3.134328 | 2.364814 | 3.0837 | 8.582843 |
| 10 | *Decaspermum parviflorum* | Myrtaceae | Taung-thabye | 2.38806 | 2.524494 | 2.202643 | 7.115197 |
| 11 | *Syzygium kurzii* | Myrtaceae | Thabye-nyo | 2.089552 | 1.823508 | 3.0837 | 6.996761 |
| 12 | *Mangifera caloneura* | Anacardiaceae | Taw-thayet | 1.641791 | 2.748499 | 1.762115 | 6.152405 |
| 13 | *Castanopsis tribuloids* | Fagaceae | Gon | 1.641791 | 2.727311 | 1.762115 | 6.131217 |
| 14 | *Myristica angustifolia* | Myristicaceae | Myauk-ma-kun-thwe | 2.686567 | 1.665779 | 1.762115 | 6.11446 |
| 15 | *Ficus glomerata* | Moraceae | Ye-thapan | 2.686567 | 1.259297 | 1.762115 | 5.707979 |
| 16 | *Gynocardia odorata* | Flacoutiaceae | Kalaw | 2.537313 | 1.07416 | 1.762115 | 5.373588 |
| 17 | *Lannea coromandelica* | Anacardiaceae | Nabe | 2.537313 | 1.775907 | 0.881057 | 5.194278 |
| 18 | *Machilus villosa* | Lauraceae | Tha-but-thein | 2.089552 | 0.80445 | 2.202643 | 5.096646 |
| 19 | *Shorea obtusa* | Dipterocarpaceae | Thit-ya | 1.492537 | 1.767522 | 1.762115 | 5.022174 |
| 20 | *Tectona grandis* | Verbanaceae | Kyun | 1.940299 | 0.419648 | 2.643172 | 5.003118 |
| 21 | *Schima khasiana* | Theaceae | Laukya | 1.492537 | 3.006044 | 0.440529 | 4.93911 |
| 22 | *Lithocarpus grandifolia* | Fagaceae | Thit-cha | 1.492537 | 1.189986 | 2.202643 | 4.885167 |
| 23 | *Fraxinus spp.* | Oleaceae | Se-kha | 0.447761 | 3.951615 | 0.440529 | 4.839905 |
| 24 | *Dalbergia oliveri* | Fabaceae | Tamalan | 1.641791 | 0.935486 | 1.762115 | 4.339392 |
| 25 | *Miliusa velutina* | Annonaceae | Thabut-gyi | 1.940299 | 0.516306 | 1.321586 | 3.778191 |
| 26 | *Lithocarpus dealbatus* | Fagaceae | Thit-e | 1.791045 | 1.097942 | 0.881057 | 3.770044 |
| 27 | *Quercus glauca* | Fagaceae | Sagat | 1.19403 | 1.67858 | 0.881057 | 3.753667 |
| 28 | *Terminalia bellerica* | Combretaceae | Thit-seint | 1.19403 | 0.597645 | 1.762115 | 3.553789 |
| 29 | *Tetrameles nudiflora* | Datiscaceae | Baing | 0.597015 | 2.369436 | 0.440529 | 3.40698 |
| 30 | *Terminalia chebula* | Combretaceae | Phan-kha | 0.895522 | 0.643766 | 1.762115 | 3.301403 |
| 31 | *Garcinia paniculata* | Hypericaceae | Metlin | 1.044776 | 0.392403 | 1.762115 | 3.199294 |
| 32 | *Pterospermum semisagittatum* | Sterculiaceae | Nagye | 0.895522 | 0.880286 | 1.321586 | 3.097395 |
| 33 | *Schleichera oleosa* | Sapindaceae | Gyo | 1.044776 | 0.707631 | 1.321586 | 3.073993 |
| 34 | *Swintonia floribunda* | Anacardiaceae | Taung-thayet | 0.597015 | 1.570296 | 0.881057 | 3.048368 |
| 35 | *Aporusa roxburghii* | Euphorbiaceae | Ye-mein | 1.044776 | 0.669503 | 1.321586 | 3.035865 |
| 36 | *Gardenia sootepensis* | Rubiaceae | Yin-gat | 0.895522 | 0.770216 | 1.321586 | 2.987324 |
| 37 | *Tetrameles nudiflora* | Tetramelaceae | Baing | 1.044776 | 1.006532 | 0.881057 | 2.932365 |
| 38 | *Lagerstroemia villosa* | Lythraceae | Zaungbale | 0.895522 | 0.963032 | 0.881057 | 2.739611 |
| 39 | *Colona floribunda* | Tiliaceae | Phet-waing | 0.447761 | 0.95685 | 1.321586 | 2.726197 |
| 40 | *Schima wallichii* | Theaceae | Pan-ma | 0.447761 | 1.32459 | 0.881057 | 2.653408 |
| 41 | *Mahonia nepalensis* | Berberidaceae | Ta Khaing Lone Kway | 0.746269 | 0.361094 | 1.321586 | 2.428948 |
| 42 | *Antiaris toxicarius* | Moraceae | Hmya-seik | 1.343284 | 0.178286 | 0.881057 | 2.402627 |
| 43 | *Artocarpus chaplasha* | Moraceae | Taung-peinne | 0.746269 | 0.241951 | 1.321586 | 2.309806 |
| 44 | *Michelia champaca* | Magnoliaceae | Saga | 0.895522 | 0.945212 | 0.440529 | 2.281263 |
| 45 | *Croton oblongifolius* | Euphorbiaceae | Thetyin-gyi | 0.746269 | 0.178612 | 1.321586 | 2.246466 |
| 46 | *Morus alba* | Moraceae | Posa | 0.447761 | 0.446081 | 1.321586 | 2.215428 |
| 47 | *Malus spp.* | Rosaceae | Taw-Panthee | 0.746269 | 1.015627 | 0.440529 | 2.202424 |
| 48 | *Sterculia angustifolia* | Sterculiaceae | Shaw | 0.746269 | 0.087551 | 1.321586 | 2.155406 |
| 49 | *Millettia cinerea* | Fabaceae | Se-min-gyi | 0.746269 | 0.08719 | 1.321586 | 2.155045 |
| 50 | *Cinamomum obtusifolium* | Lauraceae | Na-lin-gyaw | 0.447761 | 0.815857 | 0.881057 | 2.144676 |
| 51 | *Ficus altissima* | Moraceae | Nyaung-peinne | 0.298507 | 0.93283 | 0.881057 | 2.112394 |
| 52 | *Ziziphus rugosa* | Rhamnaceae | Zi-ganauk | 0.746269 | 0.423189 | 0.881057 | 2.050515 |
| 53 | *Stereospermum grandiflorum* | Bignoniaceae | Thande | 0.597015 | 1.001351 | 0.440529 | 2.038894 |
| 54 | *Cinamomum glanduliferum* | Lauraceae | Seik-nan | 0.447761 | 0.680164 | 0.881057 | 2.008982 |
| 55 | *Cratoxylum pruniflorum* | Hypericaceae | Sa-thange-ohnauk | 0.597015 | 0.580586 | 0.440529 | 1.61813 |
| 56 | *Millingtonia hortensis* | Bignoniaceae | Akayit | 0.447761 | 0.712412 | 0.440529 | 1.600702 |
| 57 | *Elaeocarpus bracteatus* | Elaeocarpaceae | Thit-phwe | 0.447761 | 0.526555 | 0.440529 | 1.414845 |
| 58 | *Ficus rumphii* | Moraceae | Nyaung | 0.149254 | 0.586791 | 0.440529 | 1.176573 |
| 59 | *Adina cordifolia* | Rubiaceae | Hnaw | 0.298507 | 0.436483 | 0.440529 | 1.175519 |
| 60 | *Juglans regia* | Juglandaceae | Thitkya | 0.597015 | 0.122068 | 0.440529 | 1.159611 |
| 61 | *Terminalia tripteroides* | Combretaceae | Thanpe | 0.447761 | 0.257831 | 0.440529 | 1.14612 |
| 62 | *Psidium guajava* | Myrtaceae | Taw-malaka | 0.298507 | 0.232321 | 0.440529 | 0.971357 |
| 63 | *Grewia tiliifolia* | Tiliaceae | Ta-yaw | 0.298507 | 0.202228 | 0.440529 | 0.941264 |
| 64 | *Hibiscus rosasinensis* | Malvaceae | Pan-swe-le | 0.149254 | 0.287527 | 0.440529 | 0.87731 |
| 65 | *Dioscorea wallichii* | Dioscoreaceae | Kadat | 0.298507 | 0.040338 | 0.440529 | 0.779374 |
| 66 | *Diospyros ehretioides* | Ebanaceae | Aukchinsa | 0.298507 | 0.035513 | 0.440529 | 0.77455 |
| 67 | *Sterculia foetida* | Sterculiaceae | Letkok | 0.149254 | 0.164711 | 0.440529 | 0.754493 |
| 68 | *Elaeocarpus floribundus* | Elaeocarpaceae | Thitpwe | 0.149254 | 0.123716 | 0.440529 | 0.713498 |
| 69 | *Dalbergia cultrata* | Fabaceae | Yin-daik | 0.149254 | 0.119939 | 0.440529 | 0.709721 |
| 70 | *Sideroxylon burmanicum* | Sapotaceae | Thit-cho | 0.149254 | 0.115083 | 0.440529 | 0.704865 |
| 71 | *Dalbergia stipulaceae* | Fabaceae | Thit-mar | 0.149254 | 0.080708 | 0.440529 | 0.670491 |
| 72 | *Bombax ceiba* | Bombacaceae | Letpan | 0.149254 | 0.059296 | 0.440529 | 0.649078 |
| 73 | *Rinorea bengalensis* | Violaceae | Taw-okshit | 0.149254 | 0.059296 | 0.440529 | 0.649078 |
| 74 | *Eurya acuminata* | Theaceae | Taw-laphet | 0.149254 | 0.0388 | 0.440529 | 0.628582 |
| 75 | *Diospyros burmanica* | Ebanaceae | Te | 0.149254 | 0.030929 | 0.440529 | 0.620711 |
| 76 | *Sageraea listeri* | Annonaceae | Kalaw | 0.149254 | 0.030657 | 0.440529 | 0.620439 |
| 77 | *Crateva magna* | Capparaceae | Taung-gadat | 0.149254 | 0.026944 | 0.440529 | 0.616727 |
| 78 | *Dalbergia kurzii* | Fabaceae | Thit-poak | 0.149254 | 0.026944 | 0.440529 | 0.616727 |
| 79 | *Cinnamomum inunctum* | Lauraceae | Kara-way | 0.149254 | 0.020238 | 0.440529 | 0.610021 |
| 80 | *Uvaria cordata* | Annonaceae | Thabut-new | 0.149254 | 0.017576 | 0.440529 | 0.607359 |
| 81 | *Atalantia monophylla* | Rutaceae | Shauk | 0.149254 | 0.017576 | 0.440529 | 0.607359 |
| 82 | *Polyalthia simiarum* | Annonaceae | Thabut | 0.149254 | 0.017244 | 0.440529 | 0.607027 |
| 83 | *Dichrostachys cinerea* | Mimosaceae | Ta-pay | 0.149254 | 0.016866 | 0.440529 | 0.606649 |
| 84 | *Melastoma spp.* | Melastomataceae | Shar-mae | 0.149254 | 0.016517 | 0.440529 | 0.606299 |

**IVI % of Tree Species in Banmauk Unclassified Forest (BUCF)**

| **No.** | **Species** | **Family** | **Local Name** | **Relative Frequency** | **Relative dominance** | **Relative density** | **IVI** |
| --- | --- | --- | --- | --- | --- | --- | --- |
| 1 | *Protium serratum* | Burseraceae | Thadi | 9.329446 | 12.93273 | 4.644809 | 26.90698 |
| 2 | *Dipterocarpus alatus* | Dipterocarpaceae | Kanyin | 6.316812 | 11.05378 | 2.459016 | 19.82961 |
| 3 | *Tectona grandis* | Verbanaceae | Kyun | 10.00972 | 3.661275 | 5.737705 | 19.4087 |
| 4 | *Dillenia pentagyna* | Dilleniaceae | Zin-byun | 5.344995 | 6.303373 | 4.644809 | 16.29318 |
| 5 | *Schleichera oleosa* | Sapindaceae | Gyo | 5.539359 | 6.614345 | 4.098361 | 16.25206 |
| 6 | *Terminalia crenulata* | Combretaceae | Htauk-kyant | 5.442177 | 5.773196 | 3.551913 | 14.76729 |
| 7 | *Dalbergia oliveri* | Fabaceae | Tamalan | 4.956268 | 3.532702 | 4.644809 | 13.13378 |
| 8 | *Quercus glauca* | Fagaceae | Sagat | 3.109815 | 3.107013 | 2.459016 | 8.675845 |
| 9 | *Aporusa roxburghii* | Euphorbiaceae | Ye-mein | 3.304179 | 1.618434 | 2.73224 | 7.654853 |
| 10 | *Shorea siamensis* | Dipterocarpaceae | Ingyin | 2.429543 | 2.983873 | 2.185792 | 7.599209 |
| 11 | *Decaspermum parviflorum* | Myrtaceae | Taung-thabye | 2.623907 | 1.822388 | 2.185792 | 6.632087 |
| 12 | *Terminalia chebula* | Combretaceae | Phan-kha | 1.846453 | 1.718025 | 2.73224 | 6.296718 |
| 13 | *Xerospermum noronhianum* | Sapindaceae | Thit-nyo | 1.749271 | 1.626335 | 2.73224 | 6.107847 |
| 14 | *Lithocarpus truncata* | Fagaceae | Thit-e | 1.846453 | 1.190721 | 1.912568 | 4.949742 |
| 15 | *Careya arborea* | Lecythidaceae | Bambwe | 1.846453 | 1.106894 | 1.912568 | 4.865915 |
| 16 | *Sideroxylon burmanicum* | Sapotaceae | Thit-cho | 1.263362 | 1.85515 | 1.639344 | 4.757856 |
| 17 | *Sterculia foetida* | Sterculiaceae | Letkok | 1.263362 | 1.460046 | 1.912568 | 4.635977 |
| 18 | *Elaeocarpus floribundus* | Elaeocarpaceae | Thitpwe | 1.166181 | 1.026215 | 1.912568 | 4.104964 |
| 19 | *Syzygium kurzii* | Myrtaceae | Thabye-nyo | 0.874636 | 2.054552 | 1.092896 | 4.022084 |
| 20 | *Vitex glabrata* | Verbanaceae | Tauksha | 1.360544 | 1.059515 | 1.36612 | 3.786179 |
| 21 | *Schima wallichii* | Theaceae | Pan-ma | 1.166181 | 1.514491 | 1.092896 | 3.773568 |
| 22 | *Ficus auriculata* | Moraceae | Sin-chaw | 0.874636 | 0.65251 | 1.912568 | 3.439714 |
| 23 | *Pterospermum semisagittatum* | Sterculiaceae | Nagye | 1.263362 | 0.585042 | 1.36612 | 3.214524 |
| 24 | *Shorea obtusa* | Dipterocarpaceae | Thit-ya | 0.971817 | 1.688312 | 0.546448 | 3.206578 |
| 25 | *Mangifera caloneura* | Anacardiaceae | Taw-thayet | 0.680272 | 1.064718 | 1.36612 | 3.11111 |
| 26 | *Lannea coromandelica* | Anacardiaceae | Nabe | 0.971817 | 0.922686 | 1.092896 | 2.9874 |
| 27 | *Terminalia tripteroides* | Combretaceae | Thanpe | 1.166181 | 1.054121 | 0.546448 | 2.76675 |
| 28 | *Tetradium glabrifolium* | Rutaceae | Kyet-maok | 0.874636 | 0.160622 | 1.639344 | 2.674602 |
| 29 | *Myristica angustifolia* | Myristicaceae | Myauk-ma-kun-thwe | 0.680272 | 0.615128 | 1.36612 | 2.66152 |
| 30 | *Albizia lucidior* | Mimosaceae | Thanthat | 0.680272 | 1.13281 | 0.819672 | 2.632754 |
| 31 | *Albizia procera* | Mimosaceae | Thit-pyu | 0.777454 | 0.473751 | 1.912568 | 2.617325 |
| 32 | *Erycibe citriniflora* | Convolvulaceae | Eikhmwe | 0.680272 | 0.750675 | 1.092896 | 2.523843 |
| 33 | *Ficus rumphii* | Moraceae | Nyaung | 0.485909 | 1.389485 | 0.546448 | 2.421841 |
| 34 | *Berrya mollis* | Euphorbiaceae | Phet-wun | 1.263362 | 0.332005 | 0.819672 | 2.41504 |
| 35 | *Gardenia sootepensis* | Rubiaceae | Yingat | 0.777454 | 0.261039 | 1.36612 | 2.404613 |
| 36 | *Baccaurea sapida* | Euphorbiaceae | Kanaso | 0.58309 | 0.441367 | 1.36612 | 2.390577 |
| 37 | *Ficus hispida* | Moraceae | Kha-aung | 0.680272 | 0.606927 | 1.092896 | 2.380095 |
| 38 | *Dracontomelon dao* | Anacardiaceae | Ngar-bauk | 0.194363 | 1.507139 | 0.546448 | 2.24795 |
| 39 | *Lithocarpus dealbatus* | Fagaceae | Thit-e | 0.485909 | 0.802378 | 0.819672 | 2.107959 |
| 40 | *Premna latifolia* | Verbanaceae | Sate-hnan | 0.485909 | 0.409535 | 1.092896 | 1.988339 |
| 41 | *Hisbiscus grewiaefolius* | Malvaceae | Thitsho | 0.485909 | 0.633811 | 0.819672 | 1.939392 |
| 42 | *Bombax ceiba* | Bombacaceae | Letpan | 0.291545 | 0.758977 | 0.819672 | 1.870195 |
| 43 | *Gmelina arborea* | Verbanaceae | Yamane | 0.485909 | 0.773821 | 0.546448 | 1.806177 |
| 44 | *Garuga pinnata* | Burseraceae | Gyi Chote | 0.58309 | 0.345324 | 0.819672 | 1.748087 |
| 45 | *Tectona hamiltoniana* | Verbanaceae | Dahat | 0.58309 | 0.253042 | 0.819672 | 1.655805 |
| 46 | *Azadirachta indica* | Meliaceae | Tama | 0.291545 | 0.798121 | 0.546448 | 1.636114 |
| 47 | *Schima khasiana* | Theaceae | Laukya | 0.485909 | 0.553936 | 0.546448 | 1.586293 |
| 48 | *Ziziphus rugosa* | Rhamnaceae | Zi-ganauk | 0.680272 | 0.181399 | 0.546448 | 1.408119 |
| 49 | *Hunteria zeylanica* | Apocynaceae | Myinlaban | 0.388727 | 0.174182 | 0.819672 | 1.382581 |
| 50 | *Michelia champaca* | Magnoliaceae | Saga | 0.58309 | 0.511155 | 0.273224 | 1.36747 |
| 51 | *Dalbergia stipulaceae* | Fabaceae | Tamalan-new | 0.388727 | 0.15658 | 0.819672 | 1.364979 |
| 52 | *Grewia tiliifolia* | Tiliaceae | Tayaw | 0.291545 | 0.095823 | 0.819672 | 1.20704 |
| 53 | *Colona floribunda* | Tiliaceae | Phet-shat | 0.291545 | 0.298434 | 0.546448 | 1.136427 |
| 54 | *Hibiscus rosasinensis* | Malvaceae | Pan-swe-le | 0.291545 | 0.289138 | 0.546448 | 1.127131 |
| 55 | *Aporusa villosa* | Euphorbiaceae | Thit-sat | 0.485909 | 0.31922 | 0.273224 | 1.078352 |
| 56 | *Spondias mangifera* | Anacardiaceae | Gway | 0.388727 | 0.118845 | 0.546448 | 1.05402 |
| 57 | *Ficus glomerata* | Moraceae | Ye-thaphan | 0.291545 | 0.192751 | 0.546448 | 1.030744 |
| 58 | *Artocarpus chaplasha* | Moraceae | Taung-peinne | 0.291545 | 0.175134 | 0.546448 | 1.013127 |
| 59 | *Swintonia floribunda* | Anacardiaceae | Taung-thayet | 0.097182 | 0.634289 | 0.273224 | 1.004695 |
| 60 | *Celtis cinnamomea* | Ulmaceae | Kha-baung | 0.485909 | 0.193062 | 0.273224 | 0.952194 |
| 61 | *Diospyros ehretioides* | Ebanaceae | Aukchinsa | 0.291545 | 0.361117 | 0.273224 | 0.925886 |
| 62 | *Gynocardia odorata* | Flacoutiaceae | Kalaw | 0.194363 | 0.348034 | 0.273224 | 0.815622 |
| 63 | *Terminalia bellerica* | Combretaceae | Thit-seint | 0.194363 | 0.067186 | 0.546448 | 0.807997 |
| 64 | *Albizia odoratissima* | Mimosaceae | Thit-magyi | 0.194363 | 0.063804 | 0.546448 | 0.804616 |
| 65 | *Miliusa velutina* | Annonaceae | Thabut-gyi | 0.194363 | 0.060419 | 0.546448 | 0.801231 |
| 66 | *Dipterocarpus tuberculatus* | Dipterocarpaceae | In | 0.194363 | 0.040043 | 0.546448 | 0.780855 |
| 67 | *Magnifera indica* | Anacardiaceae | Thayet | 0.097182 | 0.40338 | 0.273224 | 0.773786 |
| 68 | *Antidesma bunius* | Euphorbiaceae | Kinbalin | 0.194363 | 0.028653 | 0.546448 | 0.769464 |
| 69 | *Tetrameles nudiflora* | Datiscaceae | Baing | 0.194363 | 0.286408 | 0.273224 | 0.753996 |
| 70 | *Morus alba* | Moraceae | Posa | 0.194363 | 0.236862 | 0.273224 | 0.704449 |
| 71 | *Malus spp.* | Rosaceae | Taw-Panthee | 0.194363 | 0.236862 | 0.273224 | 0.704449 |
| 72 | *Adina cordifolia* | Rubiaceae | Hnaw | 0.291545 | 0.122871 | 0.273224 | 0.687641 |
| 73 | *Diospyros burmanica* | Ebanaceae | Te | 0.194363 | 0.157734 | 0.273224 | 0.625321 |
| 74 | *Zanthoxylum acanthopodium* | Rutaceae | Thabye-sintpwar | 0.097182 | 0.254081 | 0.273224 | 0.624487 |
| 75 | *Cratoxylum pruniflorum* | Hypericaceae | Sa-thange-ohnauk | 0.097182 | 0.200177 | 0.273224 | 0.570583 |
| 76 | *Machilus villosa* | Lauraceae | Tha-but-thein | 0.097182 | 0.157065 | 0.273224 | 0.527471 |
| 77 | *Stereospermum grandiflorum* | Bignoniaceae | Thande | 0.097182 | 0.155095 | 0.273224 | 0.525501 |
| 78 | *Castanopsis tribuloids* | Fagaceae | Gon | 0.194363 | 0.029228 | 0.273224 | 0.496815 |
| 79 | *Uvaria cordata* | Annonaceae | Thabut-new | 0.097182 | 0.110678 | 0.273224 | 0.481084 |
| 80 | *Chukrasia velutina* | Meliaceae | Yinma | 0.097182 | 0.068704 | 0.273224 | 0.439109 |
| 81 | *Rinorea bengalensis* | Violaceae | Taw-okshit | 0.097182 | 0.068704 | 0.273224 | 0.439109 |
| 82 | *Dalbergia obtusifolia* | Fabaceae | Wun-byaung | 0.097182 | 0.053764 | 0.273224 | 0.424169 |
| 83 | *Syzygium grande* | Myrtaceae | Thabye-pinpwa | 0.097182 | 0.036689 | 0.273224 | 0.407095 |
| 84 | *Mahonia nepalensis* | Berberidaceae | Ta Khaing Lone Kway | 0.097182 | 0.018794 | 0.273224 | 0.389199 |
| 85 | *Caesalpinia crista* | Caesalpiniaceae | Met-lin | 0.097182 | 0.018794 | 0.273224 | 0.389199 |
| 86 | *Mucuna pruriens* | Fabaceae | Khwele-ya | 0.097182 | 0.018794 | 0.273224 | 0.389199 |
| 87 | *Croton oblongifolius* | Euphorbiaceae | Thetyin-gyi | 0.097182 | 0.015532 | 0.273224 | 0.385938 |
| 88 | *Melanorrhoea usitata* | Anacardiaceae | Thitsi | 0.097182 | 0.014917 | 0.273224 | 0.385323 |
| 89 | *Stereospermum suaveolens* | Bignoniaceae | Kywe-ma-gyo-lein | 0.097182 | 0.014635 | 0.273224 | 0.385041 |
| 90 | *Zanthoxylum spp.* | Rutaceae | Tazat | 0.097182 | 0.014614 | 0.273224 | 0.38502 |
| 91 | *Melastoma spp.* | Melastomataceae | Shar-mae | 0.097182 | 0.014018 | 0.273224 | 0.384423 |
